1 **Immune profile of children with post-acute sequelae of SARS-CoV-2 infection (Long Covid)**

2 Gabriele Di Sante, MD<sup>1\*</sup>; Danilo Buonsenso, MD<sup>2,3,4\*</sup>; Cristina De Rose, MD<sup>3</sup>; Piero Valentini,  
3 Prof<sup>3</sup>; Francesco Ria, MD<sup>1,2</sup>; Maurizio Sanguinetti, Prof<sup>2,5</sup>; Michela Sali, MD<sup>2,5</sup>

4

5 <sup>1</sup> Dipartimento di Medicina e Chirurgia Traslazionale, Sezione di Patologia Generale, Università  
6 Cattolica del Sacro Cuore, Roma, Italia

7 <sup>2</sup> Dipartimento di Scienze di laboratorio e infettivologiche, Fondazione Policlinico Universitario A.  
8 Gemelli IRCCS, Rome, Italy

9 <sup>3</sup> Department of Woman and Child Health and Public Health, Fondazione Policlinico Universitario  
10 A. Gemelli IRCCS, Rome, Italy

11 <sup>4</sup> Global Health Research Institute, Istituto di Igiene, Università Cattolica del Sacro Cuore, Roma,  
12 Italy

13 <sup>5</sup> Dipartimento di Scienze biotecnologiche di base, cliniche intensivologiche e perioperatorie –  
14 Sezione di Microbiologia, Università Cattolica del S. Cuore

15

16 \*Equally contributed as first authors

17

18 **Correspondence**

19 Danilo Buonsenso

20 Largo A. Gemelli 8, 00168, Rome, Italy

21 Email: [danilobuonsenso@gmail.com](mailto:danilobuonsenso@gmail.com)

22 Tel/Fax : +390630154390

23 Twitter: @surf4children

24

25 **Funding:** nothing to declare

26 **Conflict of interests:** nothing to declare

27 **Data statement availability:** dataset is available upon request to the corresponding author

28 **Word count:** 658

29

30 **Abstract**

31 There is increasing reporting by patients' organization and researchers of long covid (or post-acute  
32 sequelae of SARS-CoV-2 - PASC), characterized by symptoms such as fatigue, dyspnea, chest  
33 pain, cognitive and sleeping disturbances, arthralgia and decline in quality of life. Immune  
34 system dysregulation with a hyperinflammatory state, direct viral toxicity, endothelial damage  
35 and microvascular injury have been proposed as pathogenic mechanisms. Recently, cohorts of  
36 children with PASC have been reported in Italy, Sweden and Russia. However, immunological  
37 studies of children with PASC have never been performed.

38 In this study, we documented significant immunologic differences between children that  
39 completely recovered from acute infection and those with PASC, providing the first objective  
40 laboratory sign of the existence of PASC in children.

41

42

43

44

45

46

47

48

49

50

51

52

## 53 **Introduction**

54 There is increasing reporting by patients' organization and researchers of long covid (or post-acute  
55 sequelae of SARS-CoV-2 - PASC), characterized by symptoms such as fatigue, dyspnea, chest  
56 pain, cognitive and sleeping disturbances, arthralgia and decline in quality of life<sup>1</sup>. Immune system  
57 dysregulation with a hyperinflammatory state, direct viral toxicity, endothelial damage and  
58 microvascular injury have been proposed as pathogenic mechanisms<sup>1</sup>. Recently, cohorts of  
59 children with PASC have been reported in Italy<sup>2</sup>, Sweden<sup>3</sup> and Russia<sup>4</sup>. However, immunological  
60 studies of children with PASC have never been performed.

61

## 62 **Methods**

63 Children with PASC after microbiologically confirmed (with PCR on nasopharyngeal swab) acute  
64 COVID-19 were identified using an internationally-developed survey  
65 (<https://isaric.org/research/covid-19-clinical-research-resources/paediatric-follow-up/>). PASC  
66 children were defined as those having persisting symptoms for more than five weeks and  
67 involvement of two systems or more. As a control group, we enrolled children that fully recovered  
68 from acute COVID-19. Children that fully recovered or with PASC assessed in a dedicated post-  
69 covid outpatient service were invited to perform an immunological assessment which included:

- 70 - T regulatory and B cells subsets, from freshly collected blood samples, labelled with  
71 DuraClone® lyophilized antibody panels and analysed with Kaluza® 2.1 (Beckman Coulter,  
72 Pasadena, CA, USA).
- 73 - expression levels of cytokines IL6, IL1 $\beta$  and TNF $\alpha$ , using the ELLA system (ProteinSimple,  
74 San Jose, California, USA) according to the manufacturer's protocol.

75 The study was approved by the ethic committee of our Institution (ID 3078). Written informed  
76 consent was obtained from all participants or legal guardians.

77

## 78 **Results**

79 We enrolled 12 children with PASC (long covid) and 17 that completely recovered from the acute  
80 infection (Table 1).

81 Distinct immunologic features were detectable comparing PASC patients and children who had  
82 recovered. The group of PASC showed significantly higher levels of plasmablasts,  $IgD^-CD27^+$   
83 memory and switched  $IgM^-IgD^-$  B cells. On the contrary, healed children had significantly higher  
84 naïve and unswitched  $IgM^+IgD^+$  and  $IgM^+CD27^-CD38^{dim}$  B cell subsets (figure 1a). The T-  
85 regulatory compartment showed no significant differences (Figure 1b). Moreover, IL6 and IL1 $\beta$   
86 serum levels were elevated in PASC patients and consistently higher than children who had  
87 recovered after infection (Figure 1c).

88

## 89 **Discussion**

90 While PASC is widely recognized in adults<sup>1</sup>, its existence in children is more controversial, since it  
91 has been speculated that this group may rather have psychological sequelae of social restrictions.

92 In this study, we documented significant immunologic differences between children that completely  
93 recovered from acute infection and those with PASC, providing the first objective laboratory sign of  
94 the existence of PASC in children. Healed children restored B-cell homeostasis, by reconstituting  
95 the naïve/unswitched B-cell compartment. In PASC children, the consistent amounts of  
96 plasmablasts, switched and memory B lymphocytes revealed the involvement of those subsets in the  
97 immunopathogenesis of chronic symptoms. Moreover, the persisting high levels of IL6 and IL1 $\beta$   
98 suggest that innate immune response played a pivotal role in children with PASC. Considering their  
99 role as mediators of inflammatory responses and auto-immune processes, these findings could  
100 explain systemic persisting symptoms such as fatigue and post-exertional malaise, headache,  
101 muscle and joint pain, and tachycardia.

102 The possibility that a low level, persistent infection after acute infection may persist in some  
103 children, contributing to the development of post-acute inflammatory conditions such as  
104 Multisystem Inflammatory Syndrome (MIS-C) or PASC has recently been suggested. The presence

105 of persisting viral particles were recently detected by immune-histochemistry and electron  
106 microscopy in dermal vascular endothelium weeks after acute infection<sup>5</sup>. Moreover, extensive burr  
107 cells (echinocytes) have been described in the blood smears of patients with MIS-C (which typically  
108 develops weeks after acute infection), and have been linked to inflammatory conditions<sup>6</sup>. Our  
109 findings provide further evidence that a chronic inflammatory process and immune dysfunction may  
110 explain why some children develop PASC, highlighting the importance of further studies aimed to  
111 better characterize this new condition. A better understating of PASC will also provide indirect  
112 benefits for other post-infectious conditions.

113 Limitations of our study are the low number of children included and the lack of ex-vivo  
114 immunologic studies performed after in-vitro stimulation with SARS-CoV-2, which we plan as a  
115 future study.

116 **References**

- 117 1. Nalbandian A, Sehgal K, Gupta A, et al. Post-acute COVID-19 syndrome. *Nat Med.* 2021  
118 Apr;27(4):601-615. doi: 10.1038/s41591-021-01283-z
- 119 2. Buonsenso D, Munblit D, De Rose C et al. Preliminary evidence on long COVID in  
120 children. *Acta Paediatr.* 2021 Apr 9. doi: 10.1111/apa.15870
- 121 3. Ludvigsson JF. Case report and systematic review suggest that children may experience  
122 similar long-term effects to adults after clinical COVID-19. *Acta Paediatr.* 2021  
123 Mar;110(3):914-921. doi: 10.1111/apa.15673.
- 124 4. Osmanov IM, Spiridonova E, Bobkova P, et al. Risk factors for long covid in previously  
125 hospitalised children using the ISARIC Global follow-up protocol: A prospective cohort  
126 study. medRxiv 2021.04.26.21256110. [doi:10.1101/2021.04.26.21256110](https://doi.org/10.1101/2021.04.26.21256110)
- 127 5. Colmenero I, Santonja C, Alonso-Riaño M, et al. SARS-CoV-2 endothelial infection causes  
128 COVID-19 chilblains: histopathological, immunohistochemical and ultrastructural study of  
129 seven paediatric cases. *Br J Dermatol.* 2020 Oct;183(4):729-737. doi: 10.1111/bjd.19327.
- 130 6. Diorio C, Henrickson SE, Vella LA, et al. Multisystem inflammatory syndrome in children  
131 and COVID-19 are distinct presentations of SARS-CoV-2. *J Clin Invest.* 2020 Nov  
132 2;130(11):5967-5975. doi: 10.1172/JCI140970

133

134

135 **Figure Legend**

136 **Cellular and cytokine immune profile of PASC and fully recovered children.** Unpaired multiple  
137 comparison between PASC (red bars) and fully recovered children (green bars) were performed  
138 with GraphPad 9.0 software (Prism) and Mann-Whitney test, corrected using Holm-Šidák method.  
139 Details pertaining to significance are noted. A) The staining with CD45-KrO, CD19-ECD, CD27-  
140 PC7, IgD-FITC, CD38-APC750, CD21-PE and IgM-PB revealed in PACS than in recovered  
141 children higher amounts of plasmablasts, IgD<sup>-</sup>CD27<sup>+</sup> memory and switched IgM<sup>-</sup>IgD<sup>-</sup> B cells  
142 (2.06%±2.74 vs 0.31%±0.74, p=0.008; 3.11%±2.66 vs 0.89%±1.19, p=0.005; 3.12%±3.41 vs  
143 0.76%±0.96, p=0.02, respectively) and lower percentages of naïve and unswitched IgM<sup>+</sup>IgD<sup>+</sup> and  
144 IgM<sup>+</sup>CD27<sup>-</sup>CD38<sup>dim</sup> B lymphocytes (1.45%±2.6 vs 4.04%±3.97, p=0.02; 1.06%±2.71 vs  
145 3.97%±4.16, p=0.02; 0.95%±1.84 vs 2.82%±3.03, p=0.02, respectively). B) T regulatory  
146 lymphocytes, labelled with CD45-KrO, CD4-PC7, CD3-APC750, CD25-PE, FoxP3-A647, Helios-  
147 PB, CD39-PC5.5, CD45RA-FITC, did not show significant differences between the two groups. C)  
148 The comparison of pro-inflammatory cytokines shows significant higher levels of IL1 $\beta$  and IL6 in  
149 the sera of PASC than of fully recovered children (9.58±14.4 vs 2.36±4.72, p=0.05; 202.73±297.4  
150 vs 50.02±173.45, p=0.03) and a trend for TNF $\alpha$  (27.7±20.67 vs 15.02±10.25, p=0,06).

151

|                                                         | <b>Fully Recovered<br/>N 17 (%)</b> | <b>Long covid / PASC<br/>N 12 (%)</b> |
|---------------------------------------------------------|-------------------------------------|---------------------------------------|
| <b>Female, n° (%)</b>                                   | 6 (35.5)                            | 4 (33.3)                              |
| <b>Age, mean ± SD</b>                                   | 7.7 ± 5.5                           | 10.3 ± 4.5                            |
| <b>Acute COVID-19 severity*, n° (%)</b>                 |                                     |                                       |
| <i>Asymptomatic</i>                                     | 2 (11.8)                            | 1 (8.3)                               |
| <i>Mild</i>                                             | 10 (58.8)                           | 11 (91.7)                             |
| <i>Moderate</i>                                         | 3 (17.6)                            | /                                     |
| <i>Severe</i>                                           | 2 (11.8)                            | /                                     |
| <b>Hospitalized during acute COVID-19, n° (%)</b>       | 5 (29.4)                            | 0                                     |
| <b>Days after acute SARS-CoV-2 infection, mean ± SD</b> | 101 ± 40.8                          | 98.5 ± 41.5                           |
| <b>Persisting Symptoms, n° (%)</b>                      | /                                   | 12 (100)                              |
| <i>Fatigue</i>                                          | /                                   | 5 (41.6)                              |
| <i>Chronic Headache</i>                                 | /                                   | 4 (33.3)                              |
| <i>Gastrointestinal symptoms</i>                        | /                                   | 4 (33.3)                              |
| <i>Post-exertional malaise</i>                          | /                                   | 3 (25.0)                              |
| <i>Muscle or Joint pain</i>                             | /                                   | 3 (25.0)                              |
| <i>Chest pain</i>                                       | /                                   | 3 (25.0)                              |
| <i>Low grade fever</i>                                  | /                                   | 2 (16.6)                              |
| <i>Chronic cough</i>                                    | /                                   | 2 (16.6)                              |
| <i>Tachicardia</i>                                      | /                                   | 1 (8.3)                               |
| <i>Sleeping disorders</i>                               | /                                   | 1 (8.3)                               |
| <b>Pre-existing conditions, n° (%)</b>                  | 3 (17.6)                            | 3 (25.0)                              |

152

153 **Table 1.** Characteristics of children that fully recovered from acute infection and those with Post-  
154 Acute sequelae of SARS-CoV-2 (PASC) (also known as long covid).

155 Pre-existing conditions: Recovered: Obesity (1), allergic asthma (1); recurrent respiratory tract  
156 infections (1); Intraventricular Defect operated at one year of age (1). PASC: allergic asthma (1);  
157 past diagnosis of Schönlein-Henoch Purpura (1); Duchenne with no oxygen support, which  
158 suffered, after mild acute COVID-19, of headache, palpitations and an unexplained 20% reduction  
159 of ejection fraction.

160 \*For acute pediatric COVID-19 the following classification was used (adapted by first Italian and  
161 Chinese studies revised at N Engl J Med. 2020 Jul 9;383(2):187-190. doi:  
162 10.1056/NEJMc2007617):



- 163 - Asymptomatic infection: without any clinical symptoms and signs, nor abnormal radiologic  
164 findings
- 165 - Mild: symptoms of acute upper respiratory tract infection, including fever, fatigue, myalgia,  
166 cough, sore throat, runny nose, and sneezing.
- 167 - Moderate: with pneumonia, frequent fever, and cough (mostly dry cough, followed by productive  
168 cough)
- 169 - Severe: early respiratory symptoms, such as fever and cough, may be accompanied by  
170 gastrointestinal symptoms, such as diarrhea. Oxygen saturation is <92% with other hypoxia  
171 manifestations.

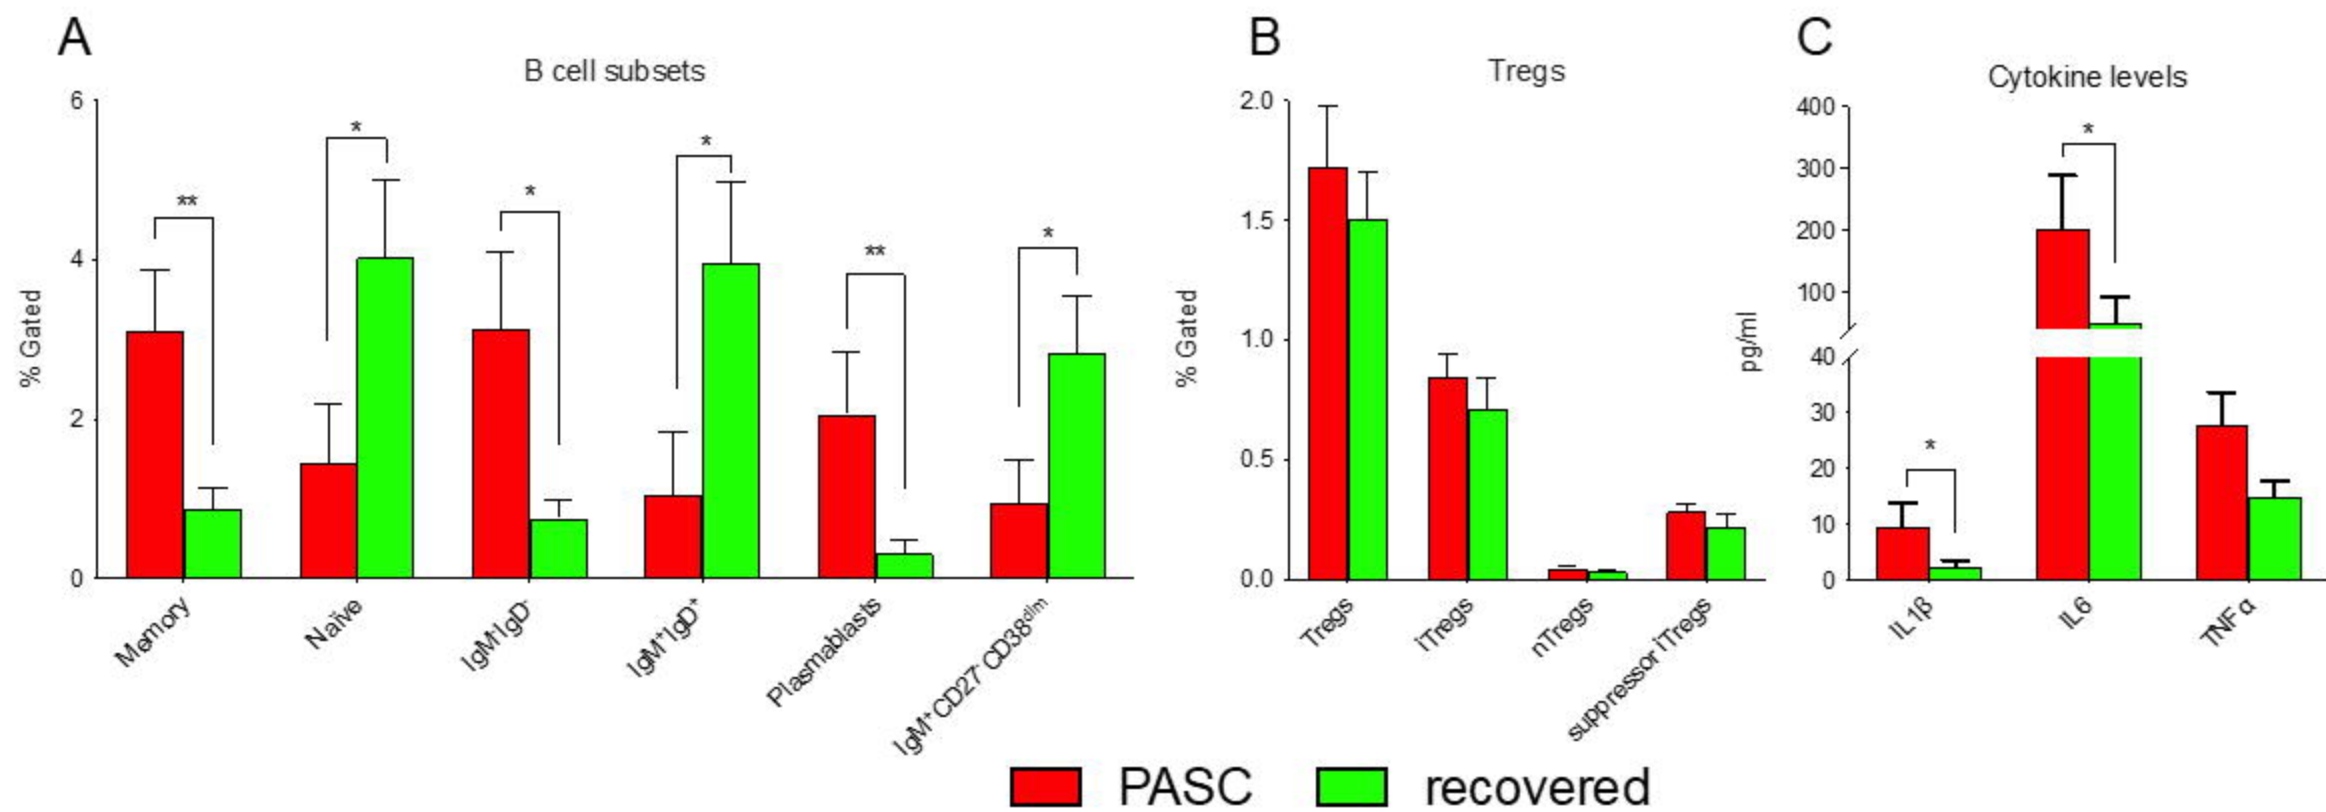

Source: https://www.medrxiv.org/content/medrxiv/early/2021/05/10/2021.05.07.21256539.full.pdf
